# Supplementary material
Source: PubMed Central journal article supplement (PMC5733741)
Supplement: Supp_Table1.pdf [file Supp_Table1.pdf]

## Supplementary Data

SUPPLEMENTARY TABLE S1. MULTIVARIATE ANALYSIS OF DIETARY PATTERN AND ASTHMA EXACERBATION

| <i>Asthma exacerbation in the prior year</i> | <i>Atopic asthma (n=210)</i>                | <i>Nonatopic asthma (n=95)</i> |
|----------------------------------------------|---------------------------------------------|--------------------------------|
|                                              | <i>Odds ratio (95% confidence interval)</i> |                                |
| At least one hospitalization for asthma      |                                             |                                |
| Healthy diet, no vitamin D insufficiency     | 1.0                                         | 1.0                            |
| Unhealthy diet, no vitamin D insufficiency   | 1.16 (0.46–2.91)                            | 1.62 (0.11–24.60)              |
| Healthy diet, with vitamin D insufficiency   | 1.30 (0.49–3.43)                            | 28.29 (1.42–564.11)*           |
| Unhealthy diet, with vitamin D insufficiency | 3.13 (1.16–8.50)*                           | 28.25 (1.32–604.35)*           |
| At least one severe asthma exacerbation      |                                             |                                |
| Healthy diet, no vitamin D insufficiency     | 1.0                                         | 1.0                            |
| Unhealthy diet, no vitamin D insufficiency   | 1.02 (0.46–2.30)                            | 1.30 (0.16–10.81)              |
| Healthy diet, with vitamin D insufficiency   | 1.25 (0.54–2.81)                            | 3.82 (0.39–37.95)              |
| Unhealthy diet, with vitamin D insufficiency | 3.86 (1.57–9.51)**                          | 5.91 (0.60–58.57)              |

All models were adjusted for age, sex, household income, and parental history of asthma. Dietary pattern: healthy diet (dietary score  $\geq 1$ ) as compared with unhealthy diet (dietary score  $\leq 0$ ).

\* $P < 0.05$ ; \*\* $P < 0.01$ .
